# Supplementary material
Source: Springer Nature journal article supplement (https://www.springermedizin.de/resource/supplementary/13561_2011_28_MOESM1_ESM.pdf/9687310)
Supplement: MOESM1 [file 9687310]

■ Atypical antipsychotics (non-switcher)

■ Atypical antipsychotics (switcher)

■ Atypical antipsychotics with adjuvant therapy

■ Typical antipsychotics (non-Switcher)

■ Typical antipsychotics (switcher)

■ Typical and atypical antipsychotics

■ No relevant outpatient drug prescriptions

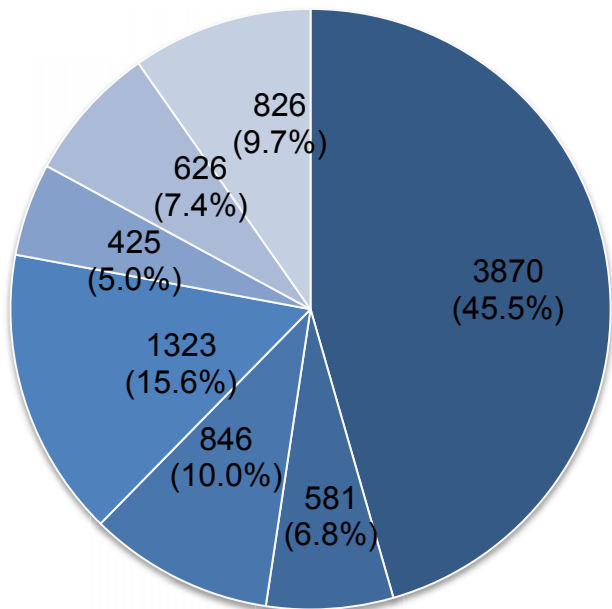

Stable patients (n=8497)

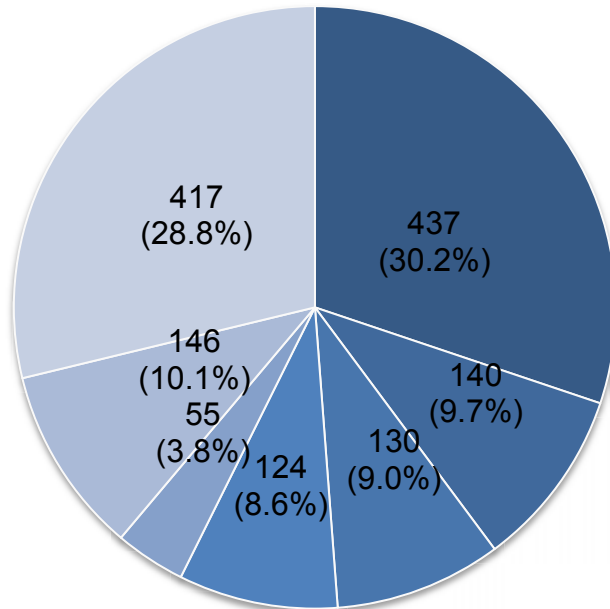

Unstable patients (n=1449)
